# Supplementary material for: Regularities of Encapsulation of Tolfenamic Acid and Some Other Non-Steroidal Anti-Inflammatory Drugs in Metal-Organic Framework Based on γ-Cyclodextrin
Source: MDPI journal article supplement (doi:10.3390/pharmaceutics15010071), 2022-12-26
Supplement: s1 [file s1]

## SUPPORTING INFORMATION

### Regularities of encapsulation of tolfenamic acid and some other non-steroidal anti-inflammatory drugs in metal organic frameworks based on $\gamma$ -cyclodextrin

Ekaterina Delyagina <sup>a,\*</sup>, Anna Garibyan <sup>b</sup>, Mikhail Agafonov <sup>b</sup>, Irina Terekhova <sup>b</sup>

<sup>a</sup>*Institute of Mathematics, Information Technology and Natural Sciences, Ivanovo State University*

<sup>b</sup>*G.A. Krestov Institute of Solution Chemistry of RAS*

**Table S1.** Models for adsorption isotherms

| Model      | Equation                                                                                                                                                                                                                                                                                                                                                                                                                                                                                                           | R <sup>2</sup> |
|------------|--------------------------------------------------------------------------------------------------------------------------------------------------------------------------------------------------------------------------------------------------------------------------------------------------------------------------------------------------------------------------------------------------------------------------------------------------------------------------------------------------------------------|----------------|
| Langmuir   | $\frac{1}{Q_e} = \frac{1}{Q_m \cdot b} + \frac{1}{C_e}$ <p>where <math>Q_e</math> (mg·g<sup>-1</sup>) - is the amount of TA that can be absorbed by a unit mass of the adsorbent at equilibrium; <math>C_e</math> (mg·L<sup>-1</sup>) – is the concentration of TA in solution at equilibrium; <math>Q_m</math> – is the maximum adsorption capacity (mg·L<sup>-1</sup>); <math>b</math> (L·mg<sup>-1</sup>) – is the Langmuir constant, which is related to the affinity between the adsorbent and adsorbate.</p> | 0.020          |
| Freindlich | $\log Q_e = \log k_F + \frac{1}{n} \log C_e$ <p>where <math>k_F</math> ((mg/g)/(mg/L)<sup>1/n</sup>) – is the constant related to the sorption capacity of the adsorbent, indicative of the affinity between the species; <math>n</math> is the constant related to the sorption intensity.</p>                                                                                                                                                                                                                    | 0.454          |
| Temkin     | $Q_e = \frac{RT}{b_T} \ln K_T + \frac{RT}{b_T} \ln C_e$ <p>where <math>b_T</math> – is the Temkin constant related to the heat of adsorption (J·mol<sup>-1</sup>); <math>K_T</math> – is the Temkin isotherm equilibrium binding constant (L·g<sup>-1</sup>); <math>R</math> – is the gas constant (8.314 J·mol<sup>-1</sup>·K<sup>-1</sup>); <math>T</math> – is the temperature (K).</p>                                                                                                                         | 0.961          |

**Table S2.** Kinetic models of drug release

| Model                 | Equation                                                                                                                                                                                                               | R <sup>2</sup>       |                      |
|-----------------------|------------------------------------------------------------------------------------------------------------------------------------------------------------------------------------------------------------------------|----------------------|----------------------|
|                       |                                                                                                                                                                                                                        | $\gamma$ CD-MOF/TA-1 | $\gamma$ CD-MOF/TA-2 |
| Zero order            | $C = K_0t$<br>K <sub>0</sub> is zero order rate constant,<br>t is the time                                                                                                                                             | 0.462                | 0.429                |
| First order           | $\log C_t = \log C_0 - k_1t/2.303$<br>C <sub>t</sub> is amount of drug released<br>in t time;<br>C <sub>0</sub> is the initial amount of<br>drug                                                                       | 0.412                | 0.355                |
| Hixson-Crowell        | $Q_0^{1/3} - Q_t^{1/3} = K_{HC}t$<br>Q <sub>0</sub> is the initial amount of<br>drug; Q <sub>t</sub> is the amount of drug<br>remained after t time; K <sub>HC</sub> is<br>Hixson-Crowell dissolution<br>rate constant | 0.462                | 0.380                |
| Korsemeyer<br>-Peppas | $\log(M_t/M_\infty) = \log k + n \log t$<br>k is dissolution rate constant;<br>n is release exponent;<br>M <sub>t</sub> /M <sub>∞</sub> is the drug release<br>fraction in the media                                   | 0.979<br>(n=0.46)    | 0.925<br>(n=0.43)    |

**Table S3.** Summary of NSAIDs loaded in  $\gamma$ CD-MOF by impregnation in ethanol and lipophilicity coefficients of NSAIDs

| Name                 | Structural formula                                                                  | Loaded amount (wt.%) | logP* |
|----------------------|-------------------------------------------------------------------------------------|----------------------|-------|
| Tolfenamic acid (TA) | 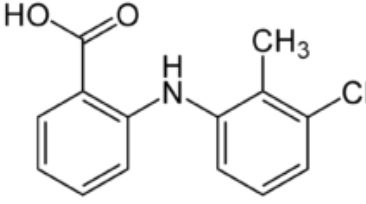   | 7                    | 5.17  |
| Niflumic acid (NA)   |    | 1.4 [30]             | 4.43  |
| Ibuprofen (IBU)      |   | 12 [24]              | 3.97  |
| Fenbufen (FEN)       |  | 16.4 [26]            | 3.2   |
| Ketoprofen (KET)     |  | 14 [27]              | 3.12  |
| Flurbiprofen (FLU)   |  | 12 [28]              | 4.16  |

\* - pubchem.ncbi.nlm.nih.gov.

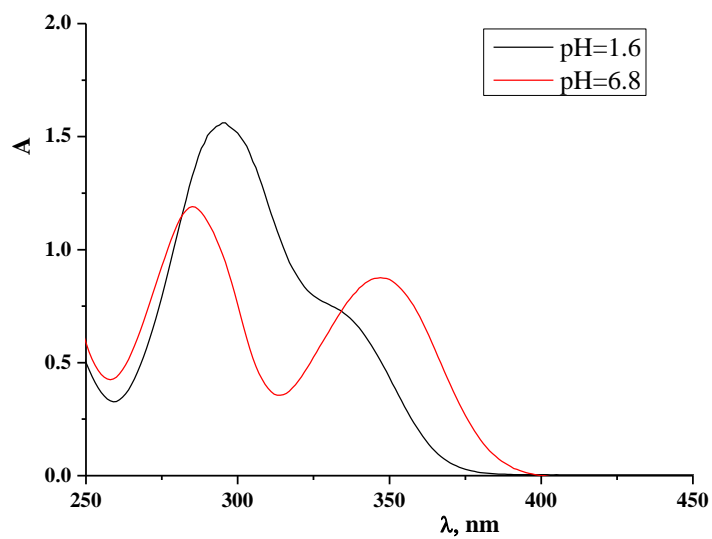

**Figure S1.** UV/vis spectra of TA in different buffers

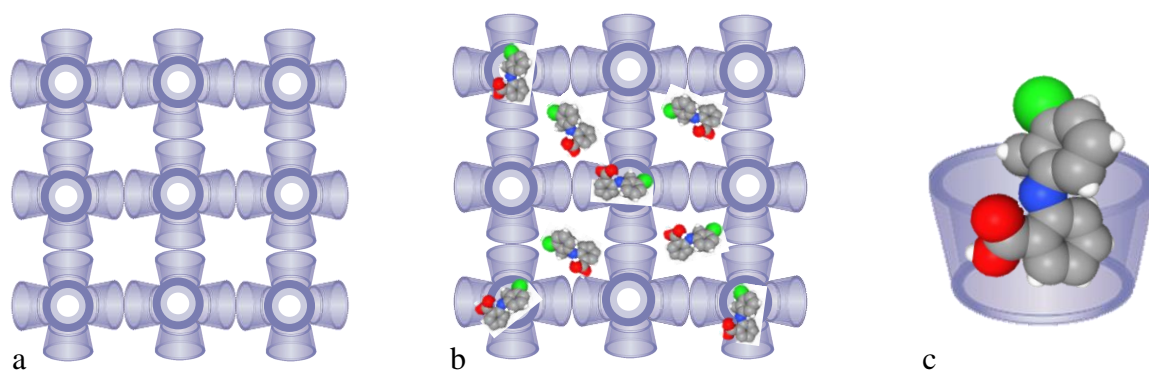

**Figure S2.** Schematic representation of  $\gamma$ CD-MOF (a),  $\gamma$ CD-MOF/TA (b) and inclusion complex  $\gamma$ -CD/TA (c).

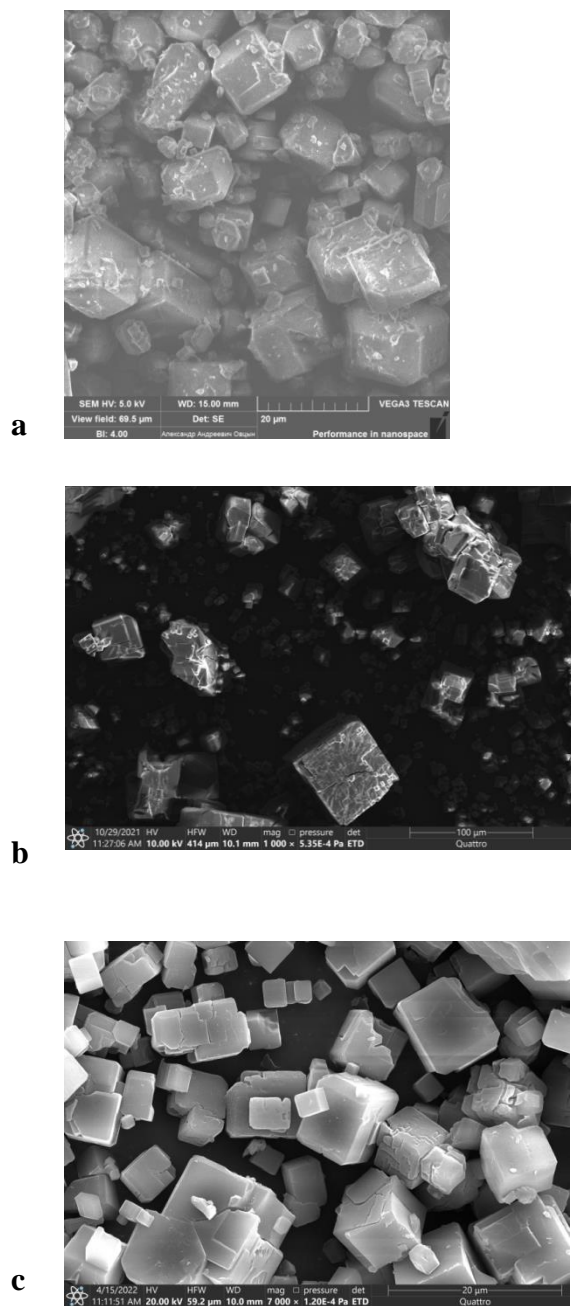

**Figure S3.** SEM images of  $\gamma$ CD-MOF (a),  $\gamma$ CD-MOF/TA-1 (b) and  $\gamma$ CD-MOF/TA-2 (c).

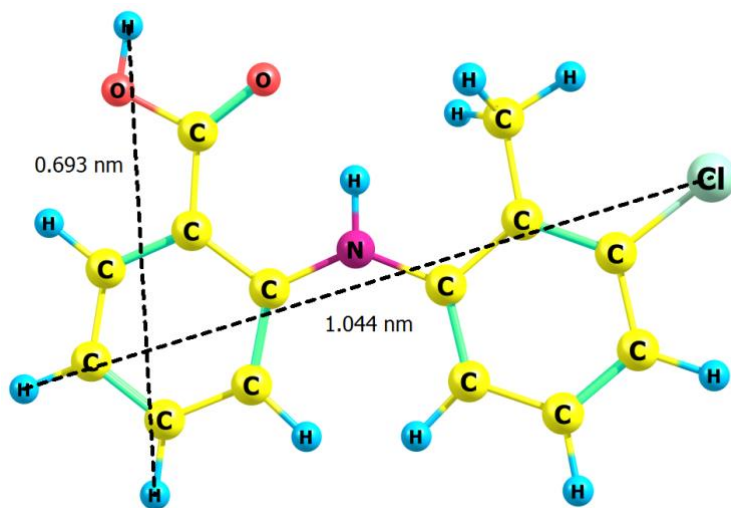

**Figure S4.** Geometric dimensions of TA.
